RESEARCH ARTICLE

# Liver Transcriptome Analysis of the Large Yellow Croaker (*Larimichthys crocea*) during Fasting by Using RNA-Seq

Baoying Qian<sup>1,2</sup>, Liangyi Xue<sup>1,3\*</sup>, Hongli Huang<sup>1</sup>

**1** College of Marine Sciences, Ningbo University, Ningbo, Zhejiang, China, **2** School of life science, Taizhou University, Taizhou, Zhejiang, China, **3** Collaborative Innovation Center for Zhejiang Marine High-Efficiency and Healthy Aquaculture, Ningbo University, Ningbo, Zhejiang, China

\* [xueliangyi@nbu.edu.cn](mailto:xueliangyi@nbu.edu.cn)

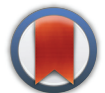

CrossMark  
click for updates

OPEN ACCESS

**Citation:** Qian B, Xue L, Huang H (2016) Liver Transcriptome Analysis of the Large Yellow Croaker (*Larimichthys crocea*) during Fasting by Using RNA-Seq. PLoS ONE 11(3): e0150240. doi:10.1371/journal.pone.0150240

**Editor:** Emanuele Buratti, International Centre for Genetic Engineering and Biotechnology, ITALY

**Received:** July 8, 2015

**Accepted:** February 11, 2016

**Published:** March 11, 2016

**Copyright:** © 2016 Qian et al. This is an open access article distributed under the terms of the [Creative Commons Attribution License](https://creativecommons.org/licenses/by/4.0/), which permits unrestricted use, distribution, and reproduction in any medium, provided the original author and source are credited.

**Data Availability Statement:** The data files were passed to NCBI's Sequence Read Archive (SRA), and the accession numbers are SRX986569 (LB2A), and SRX986572 (LF1A). The series record GSE67756, which has been submitted to the NCBI GEO database, contained all of the analysis data of this paper.

**Funding:** The project was supported by National Natural Science Foundation of China (Grant No. 31172398), <http://www.nsf.gov.cn/publish/portal0/>, LX: \$. 96,660; Science and Technology Department of Ningbo Municipality (Grant No. 2015C110005), <http://www.nbsti.gov.cn/gb/>, LX: \$. 84,577.5; The

## Abstract

The large yellow croaker (*Larimichthys crocea*) is an economically important fish species in Chinese mariculture industry. To understand the molecular basis underlying the response to fasting, Illumina HiSeq™ 2000 was used to analyze the liver transcriptome of fasting large yellow croakers. A total of 54,933,550 clean reads were obtained and assembled into 110,364 contigs. Annotation to the NCBI database identified a total of 38,728 unigenes, of which 19,654 were classified into Gene Ontology and 22,683 were found in Kyoto Encyclopedia of Genes and Genomes (KEGG). Comparative analysis of the expression profiles between fasting fish and normal-feeding fish identified a total of 7,623 differentially expressed genes ( $P < 0.05$ ), including 2,500 upregulated genes and 5,123 downregulated genes. Dramatic differences were observed in the genes involved in metabolic pathways such as fat digestion and absorption, citrate cycle, and glycolysis/gluconeogenesis, and the similar results were also found in the transcriptome of skeletal muscle. Further qPCR analysis confirmed that the genes encoding the factors involved in those pathways significantly changed in terms of expression levels. The results of the present study provide insights into the molecular mechanisms underlying the metabolic response of the large yellow croaker to fasting as well as identified areas that require further investigation.

## Introduction

Several single net-cage-farmed marine fish, including the large yellow croaker (*Larimichthys crocea*), undergo alternating periods of fasting and feeding during their life cycle, which is mainly due to the temperature changes in the aquatic environment [1]. In the winter, this fish species would undergo fasting for almost three months. The fasting condition is strongly associated with changes in lipid metabolism and storage, as well as mobilization of body energy reserves [2], particularly those involving the liver, which is an indicator organ of the nutritional and physiological status of an organism [3]. The liver is also the first organ that is affected when fish are subjected to food deprivation [4]. Several changes occur during fasting and re-feeding of teleosts [5–7], which include enzymatic activities, hormone levels, and protein synthesis or protein turnover [8–11].

Project Supported by Zhejiang Provincial Natural Science Foundation of China (Grant No. LY15C190005), <http://www.zjnsf.gov.cn/>, LX: \$14,449; The open fund of Zhejiang Provincial top key discipline of aquaculture in Ningbo University (Grant No. xkzsc1410), <http://www.nbu.edu.cn/>, BQ: \$12,888; K. C. Wong Magna Fund in Ningbo University, <http://www.nbu.edu.cn/>, LX: \$0. The funders had no role in study design, data collection and analysis, decision to publish, or preparation of the manuscript.

**Competing Interests:** The authors have declared that no competing interests exist.

In recent years, the development of the transcriptome sequencing technology and progress in bioinformatics, particularly in the development of *de novo* assembly tools, have provided an unprecedented increase in transcriptome data on gene expression, biological pathways, and molecular mechanisms [12–17]. Transcriptome assembly and annotation has been conducted in various fish species such as the rainbow trout (*Salmo gairdneri*) [18], zebrafish (*Danio rerio*) [19], sea bass (*Lateolabrax japonicus*) [20], steelhead (*Oncorhynchus mykiss*) [21], and sea bream (*Sparus aurata*) [22]. Using a large yellow croaker spleen, Mu *et al.* detected changes in immune system-relevant genes, as well as in several signaling pathways involved in immunity during infection of *Aeromonas hydrophila* [23] and the induction of polyriboinosinic:polyribocytidylic acid [24]. Xiao *et al.* studied the comprehensive transcriptome from multi-tissue mixture of the large yellow croaker [25]. Studies on the transcriptome of the large yellow croaker have been previously conducted, but these mainly focused on immunity. There are currently no reports on the use of *de novo* RNA-seq technology to analyze changes in the transcriptome profile of this fish during fasting.

The large yellow croaker is an economically important marine fish in China, and its annual output is the largest among any other single net-cage-farmed marine species [23, 24]. This fish species naturally undergoes fasting in the summer and winter of each year as a response to the respective high or low temperature of seawater. Therefore, this fish utilizes liver fat and hepatic glycogen to generate energy during fasting seasons, and consequently stores liver glycogen and synthesizes liver fat when re-feeding. In the present study, the large yellow croaker was used as a model to investigate the molecular response underlying the fasting condition. To further understand the molecular basis of this particular metabolic reaction and to explore the key genes and pathways of fat metabolism and the glycometabolism in the large yellow croaker, the Illumina HiSeq™ 2000 sequencing technology was used to conduct a transcriptome profiling analysis of this fish. A transcriptome database containing 38,728 identified unigenes were obtained, and the unigenes that were found to be involved in the fat metabolism, glycometabolism, and protein metabolism pathways were further analyzed. A comparative gene transcription analysis of livers from fasting fish and normal-feeding fish was performed using the RNA-seq technology to investigate its differential transcriptomic profile. Furthermore, real-time PCR was used to analyze the changes in expression of metabolically relevant genes encoding for key enzymes involved in fasting and re-feeding.

## Results

### RNA-seq of liver transcriptome

To better understand the molecular changes in the metabolic response of the fasting large yellow croaker, two Solexa cDNA libraries were constructed from the livers of fasting and normal feeding large yellow croaker. After conducting replicate experiments and ensuring quality control, Illumina HiSeq™ 2000 was used in sequencing the cDNA libraries. High-throughput paired-end sequencing yielded 60,090,728 and 57,121,620 total raw reads from the livers of fasting fish and normal feeding fish, respectively. Then, 54,933,550 and 52,848,276 clean reads were obtained after filtering the raw reads. The clean reads were assembled into 110,364 and 109,023 contigs, respectively, using the short oligonucleotide analysis package (SOAP) *de novo* software (Fig 1), respectively. Ultimately, 60,998 unigenes were annotated from 110,364 contigs, and 59,671 unigenes were annotated from 109,023 contigs.

### Analysis of liver differential expression profiles between fasting and normal-feeding large yellow croakers

To identify the differentially expressed genes, the liver transcriptome data of the large yellow croakers at 21 days after fasting and normal feeding were analyzed by using fragments per kb

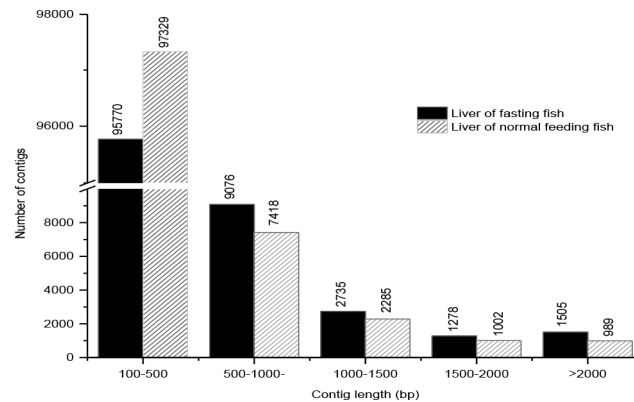

**Fig 1. Length statistics of contigs obtained from the two livers of large yellow croaker transcriptome libraries.** The length distribution of the transcriptome libraries is shown. Sequences with lengths of 100–500 bp were the most abundant in the two transcriptome libraries, encompassing 86.78% and 89.27% of the contigs in the transcriptome library of fasting fish and normal feeding fish, respectively.

doi:10.1371/journal.pone.0150240.g001

per million fragments (FPKM) [26]. The criteria of a two-fold or greater change in expression and  $P < 0.05$  were selected to identify the significantly upregulated or downregulated genes during fasting. Using this criteria, a total of 7,623 differentially expressed genes were detected, including 2,500 upregulated genes and 5,123 downregulated genes (S1 Table).

To generate an overview of the functions of the differentially expressed genes identified by FPKM, Gene Ontology (GO) analysis of these genes was performed using GO-TermFinder. According to the GO terms, 8,487 genes were classified into three major functional categories, including 2937 genes in biological process, 2699 genes in cellular component, and 2851 genes in molecular function. The terms from the function ontology with a  $P \geq 1$  in each category were distributed across more than 100 subcategories. The differentially expressed genes in the biological processes were determined to be mainly related to protein metabolism, fat metabolism, glycometabolism, and nucleic acid metabolism. The main subcategory of the cellular component was the cytoplasmic part, and in the category of molecular function, the most significant subcategory was oxidoreductase activity.

To identify the biological pathways that were active in the large yellow croaker at 21-d fasting fish, 7,623 differentially expressed genes were mapped to canonical signaling pathways that were found in the Kyoto Encyclopedia of Genes and Genomes (KEGG). Ultimately, a total of 3,859 genes were mapped to 67 statistically significant categories ( $P < 0.05$ ). The top 33 pathways are summarized in Table 1. Among these pathways, protein processing in the endoplasmic reticulum was represented by 44 downregulated genes. Six upregulated genes and 7 downregulated genes were involved in pyruvate metabolism. Several genes were also determined to be involved in major metabolic-related pathways such as fat digestion and absorption pathway, protein export pathway, citrate cycle (TCA cycle), and glycolysis/gluconeogenesis pathway.

## Annotation of metabolism-relevant genes and pathways of the large yellow croaker liver

Most of the metabolism-relevant genes were significantly differentially expressed in the large yellow croaker liver after 21 d of fasting (Table 2). These genes encoding various key enzymes were found to be mainly associated with lipid metabolism (*FABP2*, *GOT2*, *NPC1L1*, *MGAT2*, *MTTP*, *APOA1*), glycometabolism (*G6PC*, *HK*, *ADPGK*, *FBP*, *pfkA*, *ALDO*, *GAPDH*, *PGAM*, *ENO*, *PEPCK*, *PK*, *LDH*, *aceE*, *DLAT*, *DLD*, *ACSS*, and *ADH1-7*), and tricarboxylic acid cycle

**Table 1. Statistically significant KEGG classifications of large yellow croaker genes.**

| Pathway                                             | Gene No.(%*) | P value      | Pathway ID |
|-----------------------------------------------------|--------------|--------------|------------|
| Metabolic pathways                                  | 716 (17.68%) | 9.00367e-31  | ko01100    |
| Complement and coagulation cascades                 | 119 (2.94%)  | 5.214812e-13 | ko04610    |
| Protein processing in endoplasmic reticulum         | 157 (3.88%)  | 1.618794e-12 | ko04141    |
| Ribosome                                            | 87 (2.15%)   | 3.504371e-12 | ko03010    |
| Pyruvate metabolism                                 | 49 (1.21%)   | 1.561337e-09 | ko00620    |
| Arachidonic acid metabolism                         | 49 (1.21%)   | 2.196846e-09 | ko00590    |
| Linoleic acid metabolism                            | 40 (0.99%)   | 4.655279e-09 | ko00591    |
| Fat digestion and absorption                        | 51 (1.26%)   | 5.5317e-09   | ko04975    |
| Proteasome                                          | 32 (0.79%)   | 1.89458e-08  | ko03050    |
| Protein export                                      | 20 (0.49%)   | 2.545384e-08 | ko03060    |
| Terpenoid backbone biosynthesis                     | 22 (0.54%)   | 7.123303e-08 | ko00900    |
| Propanoate metabolism                               | 39 (0.96%)   | 5.035928e-07 | ko00640    |
| Steroid biosynthesis                                | 23 (0.57%)   | 1.735558e-06 | ko00100    |
| Vitamin digestion and absorption                    | 32 (0.79%)   | 5.084006e-06 | ko04977    |
| Synthesis and degradation of ketone bodies          | 12 (0.3%)    | 6.549285e-06 | ko00072    |
| Pentose and glucuronate interconversions            | 30 (0.74%)   | 1.030834e-05 | ko00040    |
| Glycine, serine and threonine metabolism            | 44 (1.09%)   | 1.316588e-05 | ko00260    |
| Steroid hormone biosynthesis                        | 30 (0.74%)   | 1.390942e-05 | ko00140    |
| Tryptophan metabolism                               | 38 (0.94%)   | 1.587954e-05 | ko00380    |
| Fatty acid metabolism                               | 40 (0.99%)   | 1.633000e-05 | ko00071    |
| Valine, leucine and isoleucine degradation          | 39 (0.96%)   | 2.03564e-05  | ko00280    |
| PPAR signaling pathway                              | 69 (1.7%)    | 2.405392e-05 | ko03320    |
| Glyoxylate and dicarboxylate metabolism             | 38 (0.94%)   | 2.538004e-05 | ko00630    |
| Glycolysis / Gluconeogenesis                        | 42 (1.04%)   | 3.846812e-05 | ko00010    |
| Citrate cycle (TCA cycle)                           | 32 (0.79%)   | 4.636611e-05 | ko00020    |
| Glutathione metabolism                              | 29 (0.72%)   | 8.95027e-05  | ko00480    |
| Cysteine and methionine metabolism                  | 32 (0.79%)   | 9.57516e-05  | ko00270    |
| Oxidative phosphorylation                           | 65 (1.61%)   | 0.0001093573 | ko00190    |
| Arginine and proline metabolism                     | 40 (0.99%)   | 0.0001315773 | ko00330    |
| Starch and sucrose metabolism                       | 38 (0.94%)   | 0.0005948898 | ko00500    |
| N-Glycan biosynthesis                               | 31 (0.77%)   | 0.0006564914 | ko00510    |
| Aminoacyl-tRNA biosynthesis                         | 28 (0.69%)   | 0.0007056859 | ko00970    |
| Glycerolipid metabolism                             | 42 (1.04%)   | 0.001604464  | ko00561    |
| Pentose phosphate pathway                           | 20 (0.49%)   | 0.001797754  | ko00030    |
| One carbon pool by folate                           | 18 (0.44%)   | 0.003600427  | ko00670    |
| Biotin metabolism                                   | 5 (0.12%)    | 0.006267265  | ko00780    |
| Amino sugar and nucleotide sugar metabolism         | 37 (0.91%)   | 0.009235502  | ko00520    |
| Ubiquinone and other terpenoid-quinone biosynthesis | 8 (0.2%)     | 0.01192872   | ko00130    |
| Nicotinate and nicotinamide metabolism              | 27 (0.67%)   | 0.02183058   | ko00760    |
| Phenylalanine, tyrosine and tryptophan biosynthesis | 5 (0.12%)    | 0.03226023   | ko00400    |

\*, indicates the percentage of genes in each pathway from 4049 genes mapped to KEGG.

doi:10.1371/journal.pone.0150240.t001

(*MDH1*, *CS*, *ACLY*, *ACO*, *IDH3*, *fumA*, *SDHA*, *LSC1*, and *DLST*). Furthermore, several other molecules were involved in the synthesis of amino acids (glycine, serine, threonine, arginine, and proline) and fatty acids. KEGG analysis identified a large number of unigenes that were enriched in various known metabolism-relevant pathways (Table 1) such as the pathway of fat

**Table 2. Differentially expressed genes related to metabolism-relevant pathways.**

| Gene name     | Gene ID            | Description                                               | Fold-change | P-value   |
|---------------|--------------------|-----------------------------------------------------------|-------------|-----------|
| <i>FABP2</i>  | Unigene24231_All   | Fatty acid-binding protein 2, intestinal                  | -14.17      | 1.99E-70  |
| <i>GOT2</i>   | Unigene26274_All   | Aspartate aminotransferase, mitochondrial                 | 1.29        | 0         |
| <i>NPC1L1</i> | Unigene41275_All   | Niemann-Pick C1-like protein 1                            | 2.39        | 6.76E-08  |
| <i>MGAT2</i>  | CL2412.Contig2_All | 2-acylglycerol O-acyltransferase 2                        | 1.05        | 3.08E-18  |
| <i>MTTP</i>   | CL69.Contig1_All   | Microsomal triglyceride transfer protein large subunit    | -2.88       | 0         |
| <i>APOA1</i>  | CL1084.Contig1_All | Apolipoprotein A-I                                        | 4.26        | 0         |
| <i>G6PC</i>   | CL2205.Contig1_All | Glucose-6-phosphatase                                     | -5.11       | 1.36E-09  |
| <i>HK</i>     | Unigene40485_All   | Hexokinase                                                | 11.42       | 3.79E-05  |
| <i>ADPGK</i>  | CL4412.Contig1_All | ADP-dependent glucokinase                                 | -1.41       | 5.19E-56  |
| <i>FBP</i>    | Unigene16513_All   | Fructose-1,6-bisphosphatase I                             | -1.18       | 2.20E-05  |
| <i>pfkA</i>   | CL830.Contig1_All  | 6-Phosphofructokinase 1                                   | -1.12       | 3.16E-06  |
| <i>ALDO</i>   | Unigene1497_All    | Fructose-bisphosphate aldolase, class I                   | 4.35        | 0         |
| <i>GAPDH</i>  | CL2528.Contig1_All | Glyceraldehyde 3-phosphate dehydrogenase                  | 2.82        | 0         |
| <i>PGAM</i>   | CL1161.Contig2_All | 2,3-Bisphosphoglycerate-dependent phosphoglycerate mutase | -1.73       | 1.21E-37  |
| <i>ENO</i>    | CL4254.Contig1_All | Enolase                                                   | 3.05        | 3.17E-194 |
| <i>PEPCK</i>  | Unigene36521_All   | Phosphoenolpyruvate carboxykinase                         | -11.58      | 3.24E-09  |
| <i>PK</i>     | Unigene13089_All   | Pyruvate kinase                                           | 1.24        | 1.92E-27  |
| <i>LDH</i>    | Unigene10413_All   | L-Lactate dehydrogenase                                   | -2.18       | 1.27E-08  |
| <i>aceE</i>   | Unigene16826_All   | Pyruvate dehydrogenase E1 component                       | -2.64       | 0         |
| <i>DLAT</i>   | Unigene10467_All   | Dihydrolipoamide acetyltransferase                        | -1.64       | 8.89E-12  |
| <i>DLD</i>    | Unigene16721_All   | Dihydrolipoamide dehydrogenase                            | 1.42        | 2.03E-186 |
| <i>ACSS</i>   | Unigene10099_All   | Acetyl-CoA synthetase                                     | -2.94       | 6.90E-59  |
| <i>ADH1_7</i> | Unigene7936_All    | Alcohol dehydrogenase 1/7                                 | 2.61        | 0         |
| <i>MDH1</i>   | Unigene42274_All   | Malate dehydrogenase                                      | 2.56        | 1.15E-05  |
| <i>CS</i>     | Unigene17567_All   | Citrate synthase                                          | -3.72       | 0         |
| <i>ACL</i>    | CL1940.Contig1_All | ATP citrate (pro-S)-lyase                                 | -4.46       | 0         |
| <i>ACO</i>    | CL2020.Contig1_All | Aconitate hydratase                                       | -1.35       | 8.66E-156 |
| <i>IDH3</i>   | Unigene14609_All   | Isocitrate dehydrogenase (NAD+)                           | -1.97       | 1.28E-113 |
| <i>fumA</i>   | Unigene29909_All   | Fumarate hydratase, class I                               | 1.18        | 3.61E-27  |
| <i>SDHA</i>   | Unigene16872_All   | Succinate dehydrogenase (ubiquinone) flavoprotein subunit | -2.82       | 1.19E-17  |
| <i>LSC1</i>   | CL362.Contig2_All  | Succinyl-CoA synthetase alpha subunit                     | -1.85       | 3.43E-24  |
| <i>DLST</i>   | Unigene40361_All   | 2-Oxoglutarate dehydrogenase E2 component                 | 1.45        | 5.37E-08  |

Identification of all differentially expressed genes was based on  $P < 0.05$ . A P value  $< 0.05$  indicated that the gene was significantly altered in fasting fish relative to that observed in normal feeding fish. The absolute value of "Fold-change" is the magnitude of up- or downregulation for each gene after fasting. "+" indicates upregulation, and "-" indicates downregulation.

doi:10.1371/journal.pone.0150240.t002

digestion and absorption, glycolysis/gluconeogenesis, citrate cycle, fatty acid metabolism, and protein processing in the endoplasmic reticulum. The remaining genes were represented by GO terms such as cytokine, apoptosis-related, and immunity genes. These biological functions and pathways have not been associated with a particular metabolism-related event.

### Differentially expressed unigenes in the glycolysis/gluconeogenesis, fat digestion and absorption, and TCA cycle pathways

To further explore the physiological response profiles induced by fasting at a single-pathway level, KEGG analysis was performed to identify genes involved in the metabolic pathway. In the present study, a large number of differentially expressed genes with functions in glycolysis,



gluconeogenesis, and fat digestion and absorption were upregulated or downregulated in the liver of the large yellow croaker following 21 d of fasting. In the pathway of glycolysis/gluconeogenesis (Fig 2), seven genes were identified as highly upregulated after 21 d of fasting, *HK*, *ALDO*, *GAPDH*, *ENO*, *PK*, *DLD*, and *ADH1-7*. On the other hand, 11 genes were highly downregulated in response to fasting after 21 days, including *G6PC*, *ADPGK*, *FBP*, *pfkA*, *PGAM*, *PEPCK*, *ACSS*, *DLAT*, *aceE*, and *LDH*. 4 genes (*FABP*, *NPC1L1*, *MAGAT*, and *ApoB-I*) were remarkably upregulated and 3 genes (*I-FABP*, *PAP*, and *Mttp*) markedly downregulated in the fat digestion and absorption pathway (Fig 3). 4 significantly upregulated genes (*fumA*, *MDH1*, *DLST* and *DLD*), and 10 significantly downregulated genes (*PEPCK*, *DLAT*, *aceE*, *CS*, *ACLY*, *ACO*, *SDHA*, *LSC1*, *sucD*, and *IDH3*) were found in the TCA cycle (Fig 4). In addition, unlike the genes involved in fat digestion and absorption, genes encoding proteins that participate in fatty acid metabolism were upregulated, except for *ACOX1*.

In skeletal muscle transcriptome after 21 days fasting, differential expressions of genes in TCA cycle were most significant with KEGG analysis. In TCA cycle, the expression patterns of some genes were similar to that of liver. For example, *HK*, *ENO* and *PK* were upregulated, and *G6PC*, *ADPGK*, *FBP*, *pfkA*, *PGAM* and *LDH* were downregulated in the pathway of glycolysis/gluconeogenesis (S1 Fig). In the TCA cycle, genes *DLST* and *DLD* were significantly upregulated, and *ACO*, *LSC1*, *sucD* were downregulated (S2 Fig). In the pathway of the fat digestion and absorption (S3 Fig), both *PAP* and *I-FABP* were upregulated. However, expression pattern of some genes was different between liver and skeletal muscle. In the pathway of the fat digestion and absorption, *CD36* and *SR-B1* were upregulated in skeletal muscle, and kept constant in the liver; *MGAT* and *Mttp* were upregulated in skeletal muscle, and downregulated in the liver; *Lipase* mRNA increased in skeletal muscle, and fluctuated in the liver.

## Protein and amino acid metabolism

RNA-seq analysis revealed that a large number of genes related to protein synthesis and protein degradation underwent significant changes in expression levels following 21 d of fasting. In the protein processing in the endoplasmic reticulum pathway, all annotated unigenes (e.g., *Sec61*, *SAR1*, *eIF2a*, and *ATF6*) were downregulated (Fig 5). A similar change in expression was observed in genes related to the protein export pathway such as genes encoding signal recognition particle subunits (*SRP9*, *SRP72*, *SRP19*, *SRP14*, *SRP68*, *SRP54*, *SRPR*, and *SRPRB*), genes encoding protein transport proteins (*SEC61 $\alpha$* , *SEC61 $\beta$* , *SEC61 $\gamma$* , *SEC62*, *SEC63*, and *SEC11*), and genes coding for signal peptidase complex subunits (*SPCS1* and *SPCS2*). Ultimately, most of genes encoding proteins related to amino acid catabolism (e.g., valine, leucine, isoleucine, arginine, and proline) were upregulated in the liver of fasting large yellow croakers.

## qPCR analysis of key genes in the glycolysis/gluconeogenesis, TCA cycle, and fat digestion and absorption pathways

To further clarify the strength of the correlations of the up- or downregulated genes to the pathway of fat digestion and absorption, glycolysis/gluconeogenesis, and TCA cycle in the large yellow croaker during the stages of fasting and re-feeding, differential expression of 14 genes was analyzed by qPCR. This experiment was also conducted to confirm the hypothesis that the glycol and fat digestion and absorption pathways elicit an adaptive response to fasting and re-feeding. The assay was performed using the large yellow croaker liver samples collected after 42 d of fasting followed by 14 d of re-feeding. Most of the results were in line with those of the RNA-seq analysis (Figs 6–8). The key genes *pfkA* and *PK* in the glycolysis/gluconeogenesis pathway that were expressed in liver tissues from the experimental groups were significantly regulated relative to that of the normal feeding group. The genes *HK* and *G6PC* showed no



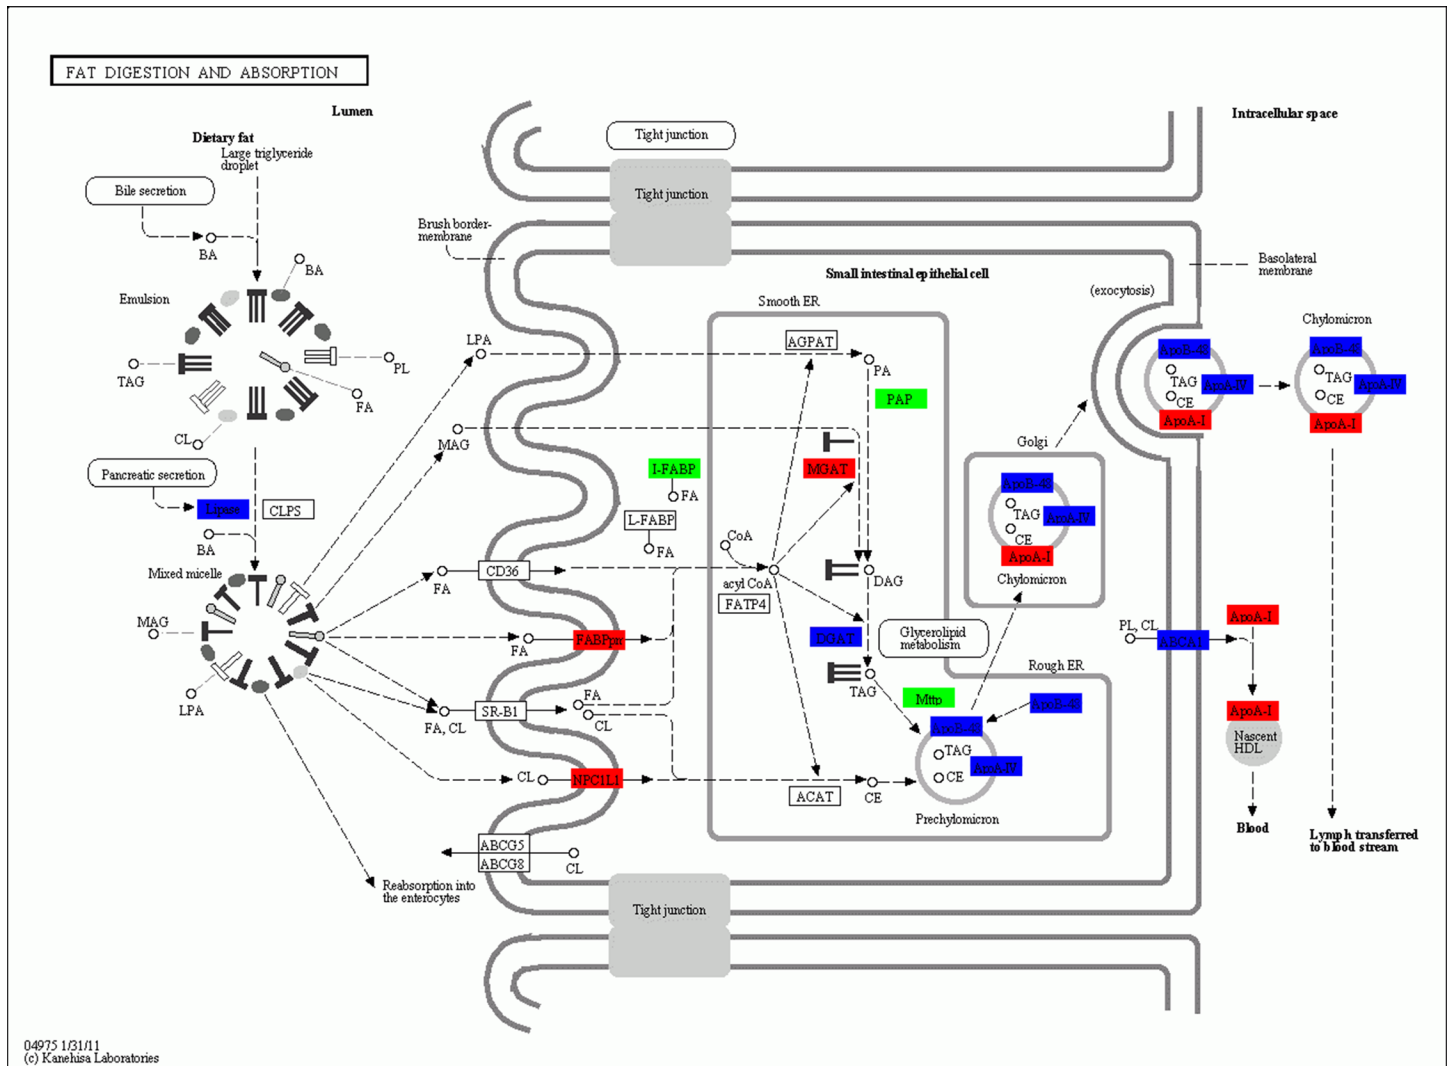

04975 1/31/11  
 (c) Kanehisa Laboratories

**Fig 3. Significantly differentially expressed genes identified by KEGG in the pathway of fat digestion and absorption.** Red indicates significantly upregulated genes, green indicates significantly downregulated genes, and blue indicates genes that were both up- and downregulated.

doi:10.1371/journal.pone.0150240.g003

significant change in the levels of gene expression after 21 days of fasting (Fig 6). In the TCA cycle pathway, genes coding for key enzymes were significantly regulated after fasting and re-feeding (Fig 8). Significant changes in the level of expression of genes related to fat digestion and absorption were observed in the large yellow croaker liver tissues compared to that observed in the control groups, except for gene *MGAT* (Fig 7).

### Discussion

Molecular studies on metabolism during fasting in the large yellow croaker are limited, and there is currently no report that describes the transcriptome profile of the liver during this particular condition. To increase our knowledge on the effect of fasting on gene expression in the large yellow croaker, the transcriptome profile of the fish after fasting was analyzed. In this study, *de novo* assembly tools [15] were used to assemble the short reads generated by RNA-seq, which in turn generated pertinent sequence information. Quantitative gene expression



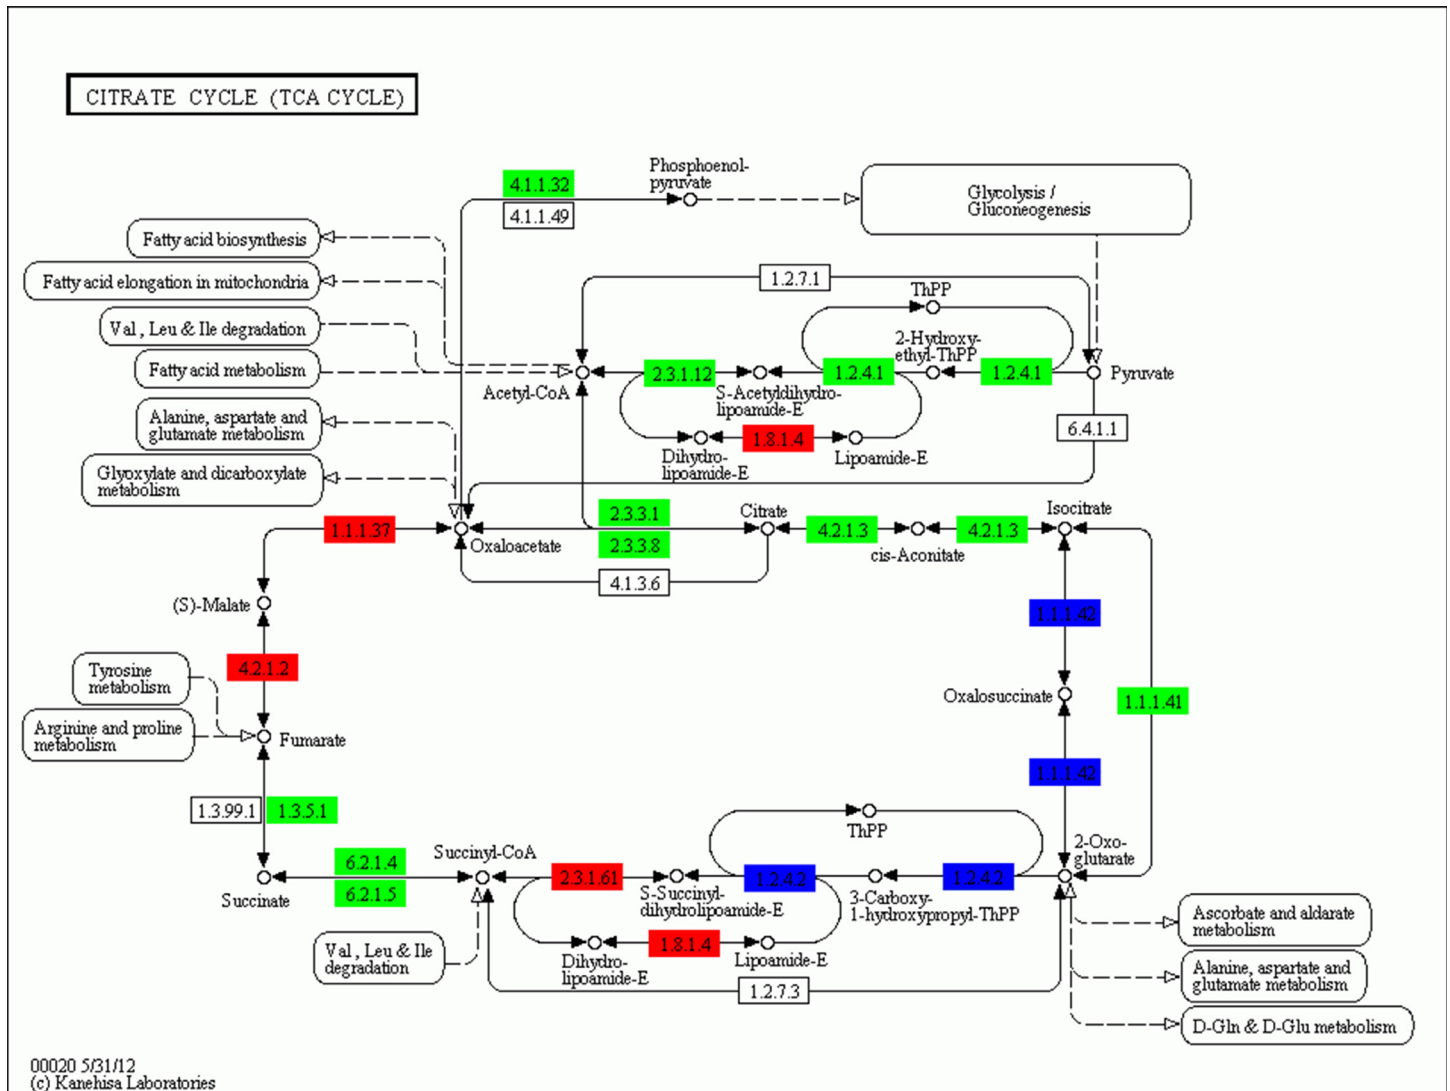

**Fig 4. Significantly differentially expressed genes identified by KEGG in the TCA cycle pathway.** Red indicates significantly upregulated genes, green indicates significantly downregulated genes, blue indicates genes that were both up- and downregulated.

doi:10.1371/journal.pone.0150240.g004

profiling was also conducted, and the unigenes were annotated and mapped to the generated transcriptome database. Several differentially expressed genes were involved in glycol, lipid, and protein metabolism such as those encoding key enzymes involved in fatty acid metabolism, amino degradation, and other biological functions.

Glucose homeostasis is precisely regulated to meet the energy demands during the fasting-re-feeding cycle in fish. Glycolysis and gluconeogenesis are opposing metabolic pathways involved in the breakdown and synthesis of carbohydrates in the liver and are essential for fish survival particularly during prolonged periods of starvation [27]. Most enzymes are shared by the glycolysis and gluconeogenesis pathways, except for three key enzymes, GK, pfkA, and PK, which catalyze unidirectional reactions in glycolysis, and another three enzymes, PEPCK, FBP, and G6PC, which induce the reverse reactions and play a key role in gluconeogenesis. In the present study, differentially expressed unigenes related to glucose metabolism were annotated in the KEGG pathway, which revealed significant changes in the expression levels of most

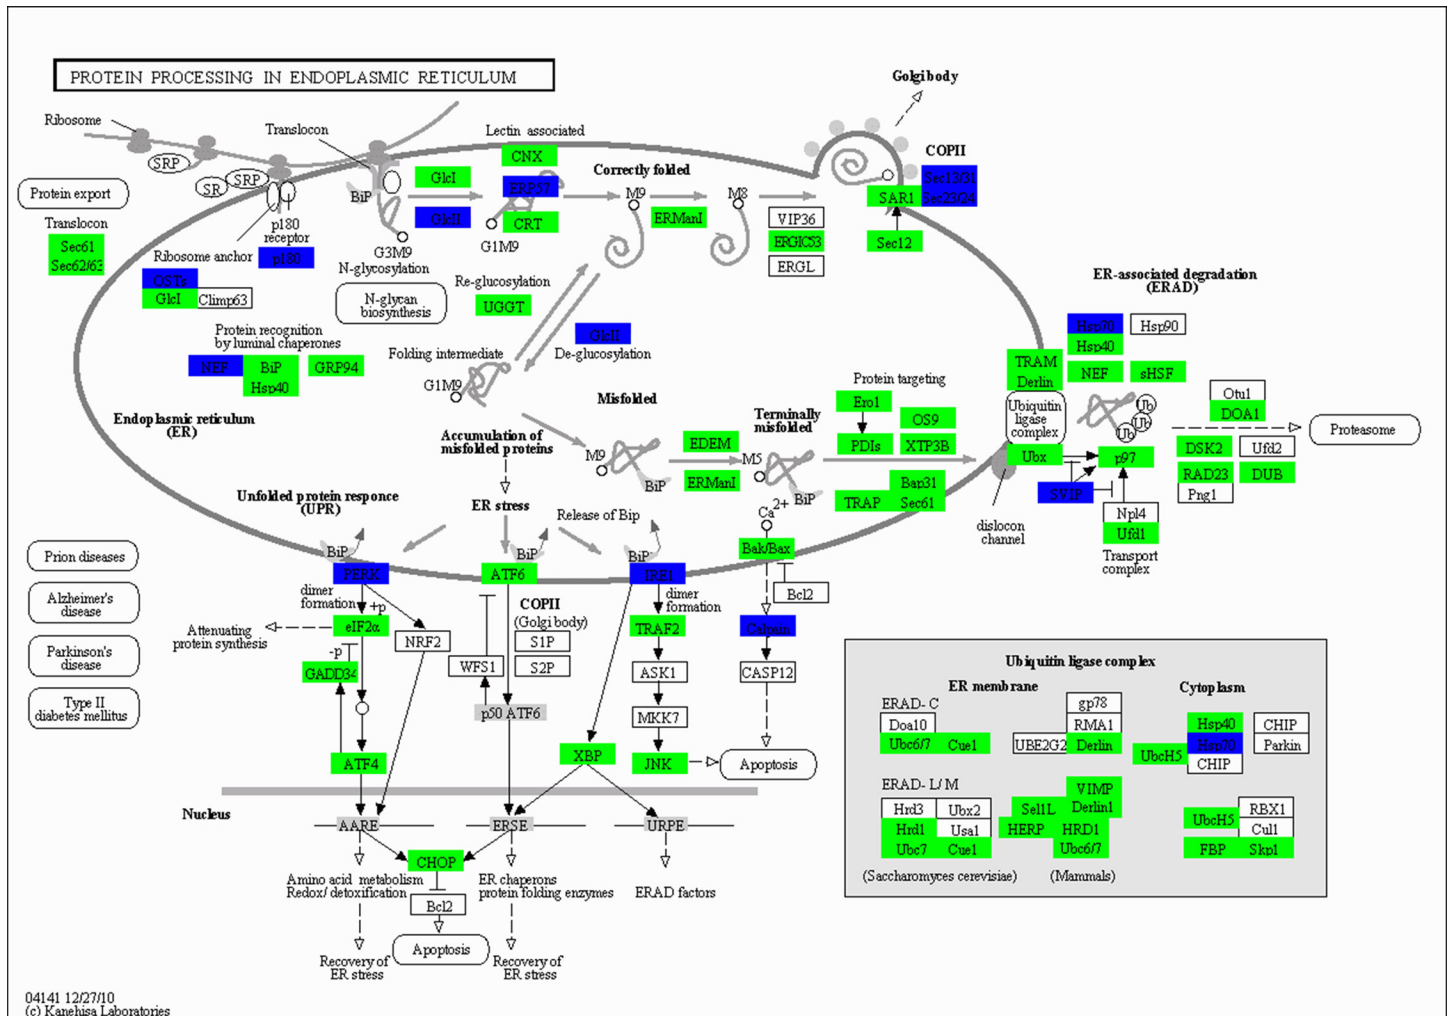

**Fig 5. Significantly differentially expressed genes identified by KEGG in the protein processing in the endoplasmic reticulum pathway.** Green indicates significantly downregulated genes, and blue indicates genes that were both up- and downregulated.

doi:10.1371/journal.pone.0150240.g005

genes coding for enzymes involved in the glycolysis/gluconeogenesis pathway. For example, the expression of key genes *PEPCK*, *FBP*, and *G6PC* were downregulated after 21 d of fasting, and it was also occurred in skeletal muscle transcriptome responding to fasting. This finding was also observed by Metón *et al.* in the gilthead seabream, wherein the value of PK and G6P-DH enzyme activities were significantly decreased after 18 days of starvation [28]. On the other hand, the *PK* gene was significantly upregulated in the glycolysis/gluconeogenesis pathway in the present study, and it was same to the result of skeletal muscle transcriptome analysis. Similar results have been reported in the muscle of the rainbow trout after 30 days of starvation [29].

Fish utilize lipids as a major source of energy [30]. In the present study, transcriptome analysis revealed that fasting led to a dramatic increase in the expression of genes encoding for proteins involved in fatty acid metabolism such as *acd*, *echA*, and *HADH*. These results suggested a reallocation of lipid reserves and cholesterol metabolism, as well as demonstrated that there was an attempt to increase lipid metabolism during fasting. Studies have shown that several genes were upregulated in the liver of the Atlantic salmon following starvation [31]. Fasting

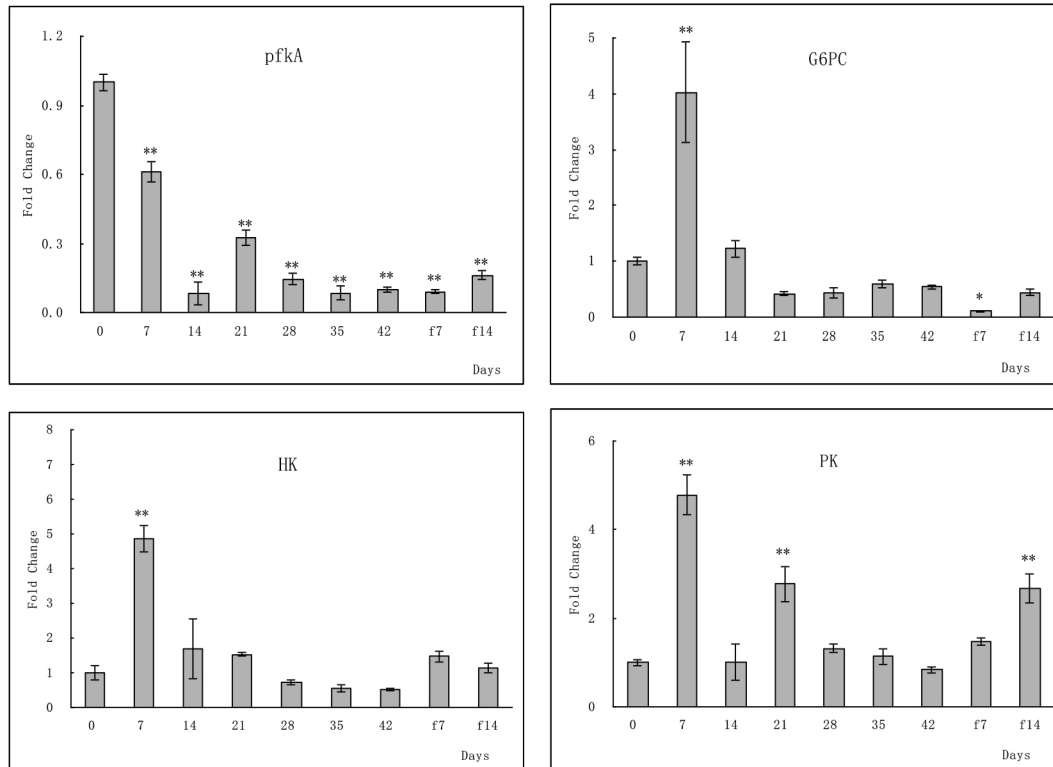

**Fig 6. qPCR analysis of genes related to the glycolysis/gluconeogenesis pathway in the large yellow croaker during fasting and re-feeding.** To determine changes in the levels of expression of the following genes, 6-phosphofructokinase 1 (*pfkA*), glucose-6-phosphatase (*G6PC*), hexokinase (*HK*), and pyruvate kinase (*PK*), the livers of 6 fish were collected at 0, 7, 14, 21, 28, 35, 42 days of fasting and 7 and 14 days of re-feeding, respectively. Total RNA was extracted from these livers and used in qPCR analysis. The mRNA level of each gene was normalized to that of  $\beta$ -actin. For each time point, values represent fold change in expression of each gene compared to that observed at 0 d fasting, which was set at 1.0. The results are expressed as means  $\pm$  SD ( $n = 3$ ). Independent-sample *t*-test using the SPSS software (Version 11.5) was conducted to determine the statistical significance of the changes in expression levels in fasting or re-feeding fish relative to that observed in 0-d fasting fish. Significant differences were considered at  $*0.01 < p \leq 0.05$  and  $**p < 0.01$ .

doi:10.1371/journal.pone.0150240.g006

fish showed an increased mRNA expression of *FABPpm*, *NPC1L1*, *MGAT*, *ApoB-I* mRNA, whereas that of *PAP*, *Mttp*, and *I-FABP* was reduced, which were confirmed by qPCR analysis. Apolipoproteins, which are plasma lipoprotein complexes, were upregulated in the liver of various fish species; these bind to lipids, which are then transported to different tissues through the blood [32]. *FABP* binds and transports long-chain fatty acids from the aqueous cytoplasm to the site of its oxidation in the mitochondria [33]. Furthermore, other up- or downregulated genes involved in the pathway of fat digestion and absorption were suggestive that hepatic fatty acid metabolism was active after fasting. Hepatic fat is the first storage tissue mobilized during fasting and perhaps the most important fat depot for energy in the large yellow croaker. Expression of some genes relate to fat-metabolism was up-regulated during fasting, and still up-regulated after 14 days re-feeding in the liver, which might implied that physiological status of the fasted fish had not recovered to normal level after re-feeding of short time. In addition, some genes encoding protein CD36 and SR-B1 were upregulated significantly in the pathway of fat digestion and absorption in skeletal muscle, and were not changed in the liver, which implied the different fat metabolism between liver and skeletal muscle, and the delay of fat digestion in skeletal muscle. *Lipase* was upregulated significantly in the skeletal muscle, which confirmed that fasting could accelerate the consumption of fat.

Most proteins are synthesized and degraded in the liver [31]. During fasting, the liver receives a smaller amount of free amino acids that are derived from digestion [34], thus

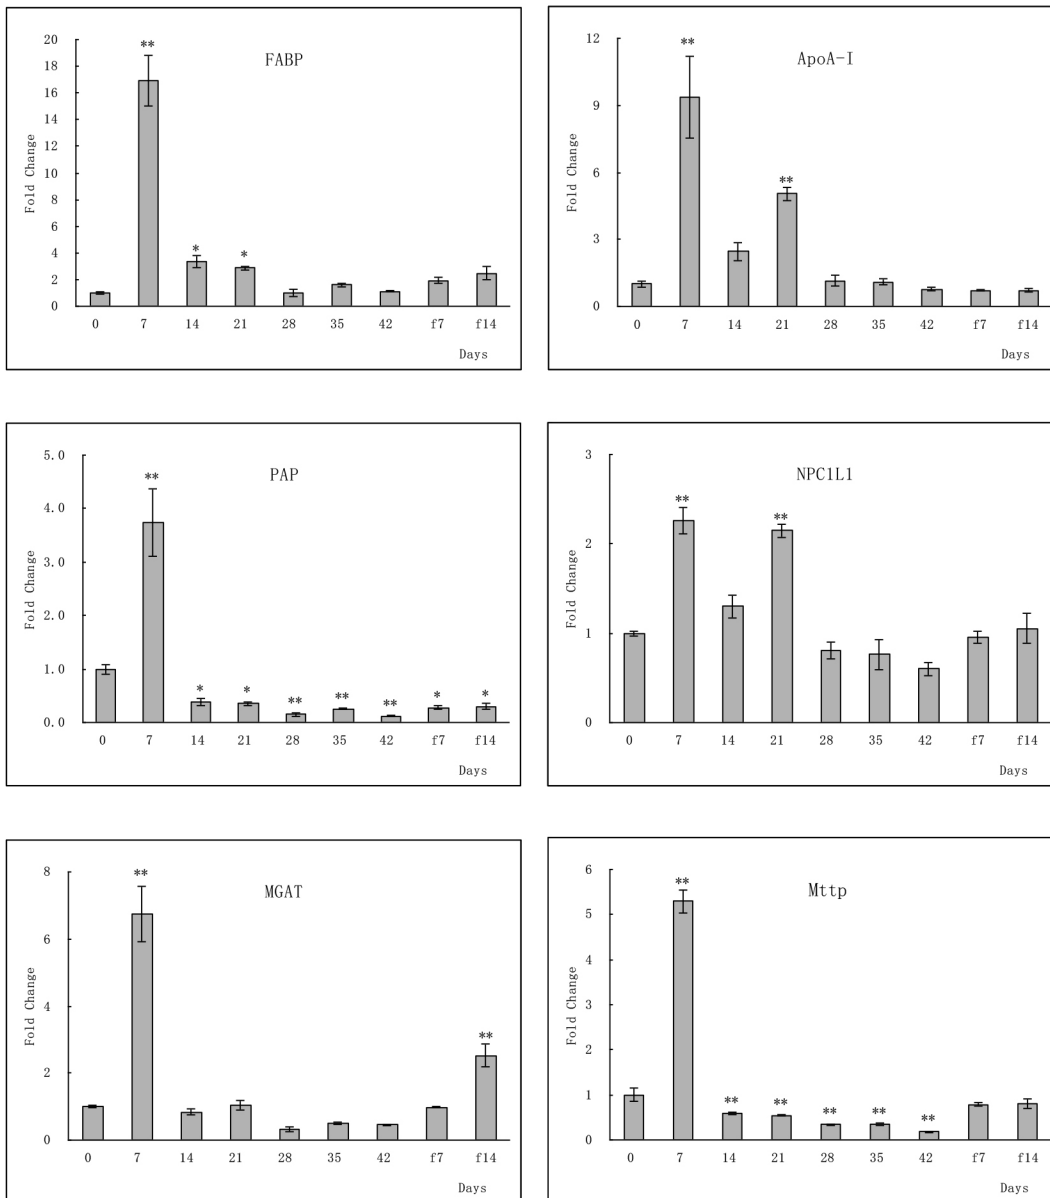

**Fig 7. qPCR analysis of the genes related to the fat digestion and absorption pathway in the large yellow croaker during fasting and re-feeding stages, namely, fatty acid-binding protein (FABP), apolipoprotein A-I (ApoA-I), phosphatidate phosphatase (PAP), Niemann-Pick C1-like protein 1 (NPC1L1), 2-acylglycerol O-acyltransferase (MGAT), microsomal triglyceride transfer protein large subunit (Mttp).** The experimental procedure was similar to that presented in Fig 6.

doi:10.1371/journal.pone.0150240.g007

resulting in a decline in the synthesis of proteins in the liver [35]. Although rates of both synthesis and degradation are decreased during fasting, these two reactions are tightly regulated. In the present study, transcriptome analysis after 21 d of fasting revealed that the levels of protein synthesis in the endoplasmic reticulum and protein transport significantly decreased, whereas the rate of amino acid catabolism increased, similar to that observed in the rainbow trout [31]. The molecules generated by the breakdown of amino acids may contribute to gluconeogenesis and subsequently enter the TCA cycle. The TCA cycle is an important aerobic pathway for the final of carbohydrate and fatty acid oxidation [36]. The present study showed that several genes encoding enzymes involved in the TCA cycle were downregulated, except for

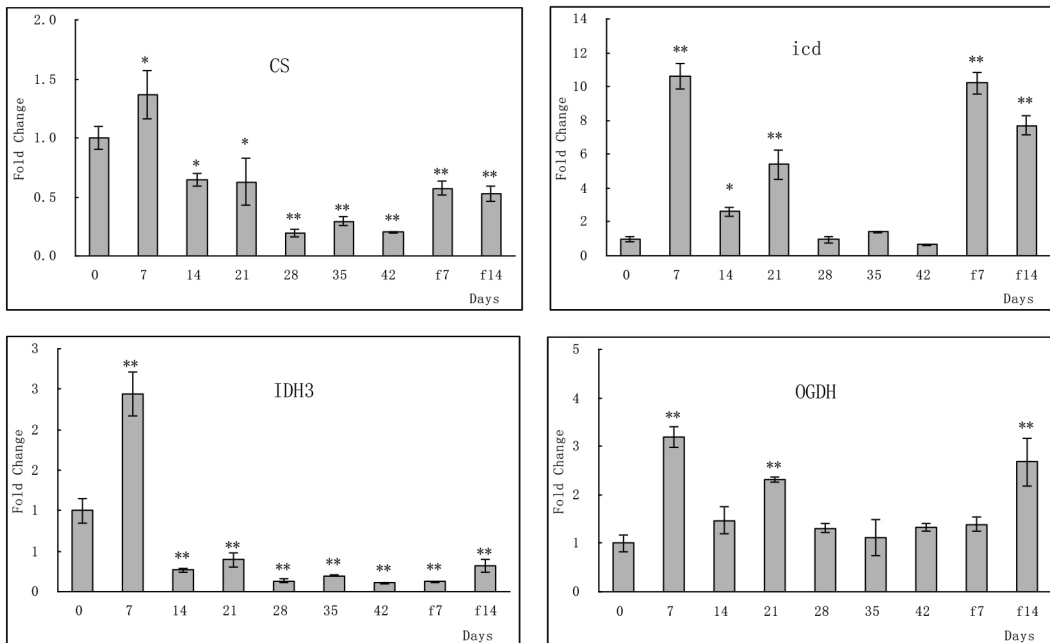

**Fig 8. qPCR analysis of the genes related to the TCA cycle pathway in the large yellow croaker during fasting and re-feeding stages, namely, citrate synthase (CS), isocitrate dehydrogenase (icd), isocitrate dehydrogenase (IDH3), 2-oxoglutarate dehydrogenase E1 component (OGDH).** The experimental procedure was similar to that presented in Fig 6.

doi:10.1371/journal.pone.0150240.g008

the *fumA-B*, *MDH1*, *DLST*, and *DLD* genes, which were upregulated. MDH1 is a key enzyme in the catalysis of oxaloacetate, and during fasting the increase in the production of oxaloacetate may be a response to the decrease in the levels of alanine, aspartate, and glutamate. Furthermore, the decrease in the level of gene expression of *DLAT* may lead to a reduction in the synthesis of acetyl-CoA, which in turn leads to the upregulation of genes coding for enzymes in the valine, leucine, and isoleucine degradation and fatty acid metabolism pathways.

## Conclusions

The present study conducted a transcriptional profiling analysis of fasting and normal feeding large yellow croakers to identify metabolism-related genes and pathways. RNA-seq data revealed major changes in the expression of metabolic genes in the fasting large yellow croaker, thus providing insights into the molecular mechanism underlying this biochemical reaction in fish. Additional studies using the transcriptome data generated in the present study will likely provide further significant insights into the detailed mechanisms of fasting in the large yellow croaker, which may in turn benefit the aquaculture industry, particularly in terms of propagating this economically important marine species.

## Materials and Methods

### Ethics Statement

The protocols used in the present study were in accordance with the “Regulations for the Administration of Affairs Concerning Experimental Animals” that was established by the Zhejiang Provincial Department of Science and Technology on the Use and Care of Animals. Animal experiments were approved by the Animal Care and Use Committee of Ningbo University. And to minimize suffering, all surgeries of this experiment were performed Tricaine-S



anesthesia. In this study, all experiment fish caught from net-cages were anesthetized by Tricaine-S (TMS, MS-222) firstly (50 mg/L). We collected the liver and skeletal muscle samples after the anesthetized fish has lost consciousness. The fish which has been taken a surgery would be sprayed with anesthetic (200 mg/L), and let it death with euthanasia.

## Fish and fasting experiments

Large yellow croakers (mean weight:  $68\pm 0.8$  g) were purchased from Xiangshan bay aquatic fingerlings company, Zhengjiang, China, on September 27. The fish were randomly cultured in 10 net-cages and the temperature of the sea water was 22°C. During first 7 days, fish was fed twice a day, at 5 o'clock in the morning and at half past 6 in the evening, with surimi made by Xiangshan bay aquatic fingerlings company until the fish stopped eating. After 7 days of acclimation, the fish was used to the fasting experiments. In this experiment, the fish had been fasted (without food entirely) for 42 days, and then re-feeding 14 days. Livers and skeletal muscle were collected from 6 fish at each time point at 0 day and every 7 days, and then stored in the storage medium, RNastore (CWBIO, China), until RNA extraction and transcriptome analysis. All experiments were conducted at the Xiangshan Bay and Ningbo University, Zhejiang, China.

## RNA isolation

Total RNA was extracted from 30 mg to 50 mg of tissue using the tissue RNA kit (Omega, China), following the manufacturer's instructions. The quality and quantity of RNA samples were determined by measuring its absorbance at 260/280 nm ( $A_{260/280}$ ) using an Ultraspec 1100 pro spectrophotometer (Healthcare Bio-Sciences AB, Sweden). The average RIN of samples was 7.5, as indicated by the Agilent 2100 Bioanalyzer (Agilent Technologies, USA).

## Library preparation and sequencing

For gene expression profiling, mRNA was extracted from the livers of fasting 21 days and normal-feeding large yellow croakers (six individuals in each group) using oligo (dT) magnetic beads, mixed with a fragmentation buffer, and subjected to fragmentation. Using the fragmented mRNA as template, cDNA was then synthesized. The short fragments were purified and resolved with EB buffer for end-repair and single nucleotide A (adenine) addition, then connected to adapters. Suitable fragments were selected as templates for PCR amplification. For QC, the Agilent 2100 Bioanalyzer and ABI StepOnePlus Real-Time PCR System were used in the quantification and qualification of the sample library. Finally, the libraries were sequenced on an Illumina HiSeq<sup>TM</sup> 2000 system. The raw data files were passed to NCBI's Sequence Read Archive (SRA), and the accession number is SRX986569 (LB2A), SRX986572 (LF1A).

## Transcript assembly and annotation

To obtain unigenes, transcriptome *de novo* assembly was conducted using the short-read assembly program, Trinity (release-20121005). Then, BLASTx alignment (e-value < 0.00001) between unigenes and protein databases such as NR, Swiss-Prot, KEGG, and COG was performed, and the best alignment results were used to establish the sequence direction of unigenes. With NR annotation, the Blast2GO program was used to perform GO annotation of the unigenes, and the KEGG Automatic Annotation Server (KAAS) system was used for pathway reconstruction. All of data have been submitted to the NCBI GEO database, and the series record is GSE67756 (<http://www.ncbi.nlm.nih.gov/geo/query/acc.cgi?acc=GSE67756>).

## Quantitative real-time PCR (qPCR) analysis

qPCR analysis was performed using the Mastercycler epgradient realplex (Eppendorf, Germany) with SYBR Green (Roche, USA) as the fluorescent dye and following the manufacturer's protocol. The primers were designed based on each identified gene sequence of the liver transcriptome library by using Primer Premier 5.0 (S2 Table). Prior to qPCR analysis, every primer was PCR validated, which indicated that no primers showed dimmers in its melting curves and a single band was observed on the agarose gels (S4 Fig). Total RNA was extracted from the liver tissues of six large yellow croakers that were sampled at 0, 7, 14, 21, 28, 35, 42 d after fasting, and 7 and 14 d of re-feeding. First-strand cDNA was synthesized from 1 µg of total RNA by using PrimeScript™ RT reagent Kit (Takara, Japan), which was then used as template for qPCR analysis using gene-specific primers. qPCR analysis was performed using a total volume of 20 µL, and the cycling conditions were as follows: 95°C for 10 min, followed by 40 cycles of 95°C for 15 s, 59°C for 40 s, and 72°C for 20 s. Each qPCR reaction was performed in triplicate, and the data of each sample were expressed relative to the expression levels of β-actin by using the  $2^{-\Delta\Delta CT}$  method [37]. Statistical significance was determined by using independent-sample *t*-test as provided in the SPSS software (Version 21), and significant differences were determined at  $P < 0.05$ .

## Supporting Information

**S1 Fig. Significantly differentially expressed genes identified by KEGG in the glycolysis/gluconeogenesis pathway of the skeletal muscle transcriptome analysis.** Red indicates significantly upregulated genes, green indicates significantly downregulated genes, pale red indicates genes that were upregulated but not significantly, and light grey indicates genes that were downregulated but not significantly.

(TIF)

**S2 Fig. Significantly differentially expressed genes identified by KEGG in the TCA pathway of the skeletal muscle transcriptome analysis.** Red indicates significantly upregulated genes, green indicates significantly downregulated genes, pale red indicates genes that were upregulated but not significantly, and light grey indicates genes that were downregulated but not significantly.

(TIF)

**S3 Fig. Significantly differentially expressed genes identified by KEGG in the fat digestion and absorption pathway of the skeletal muscle transcriptome analysis.** Red indicates significantly upregulated genes, green indicates significantly downregulated genes, pale red indicates genes that were upregulated but not significantly, and light grey indicates genes that were downregulated but not significantly.

(TIF)

**S4 Fig. Agarose gel electrophoresis of primers validation.** Namely, β-actin, 6-phosphofructokinase 1 (*pfkA*), glucose-6-phosphatase (*G6PC*), hexokinase (*HK*), and pyruvate kinase (*PK*) fatty acid-binding protein (*FABP*), apolipoprotein A-I (*ApoA-I*), phosphatidate phosphatase (*PAP*), Niemann-Pick C1-like protein 1 (*NPC1L1*), 2-acylglycerol O-acyltransferase (*MGAT*), microsomal triglyceride transfer protein large subunit (*Mttp*) citrate synthase (*CS*), isocitrate dehydrogenase (*icd*), isocitrate dehydrogenase (*IDH3*) 2-oxoglutarate dehydrogenase E1 component (*OGDH*).

(TIF)

**S1 Table. Details on 7624 differentially expressed genes in expression profile of large yellow croaker.** The data show the 7624 unigenes that were differentially expressed in the 21 d fasting

and normal large yellow croaker.  
(XLS)

**S2 Table. Primers for quantitative real-time PCR.**  
(DOC)

## Acknowledgments

We thank LetPub ([www.letpub.com](http://www.letpub.com)) for its linguistic assistance during the preparation of this manuscript.

## Author Contributions

Conceived and designed the experiments: LYX BYQ. Performed the experiments: BYQ HLH. Analyzed the data: BYQ. Contributed reagents/materials/analysis tools: BYQ LYX.

## References

1. Aranda A, Sanchez-Vázquez FJ, Madrid JA. Effect of short-term fasting on macronutrient self-selection in sea bass. *PHYSIOL BEHAVE* 2001 73: 105–109.
2. Takahashi LS, Biller JD, Cricuolo-Urbinati E, Urbinati EC. Feeding strategy with alternate fasting and re-feeding: effects on farmed pacu production. *J ANIM PHYSIOL AN N* 2011 95: 259–266.
3. Caballero MJ, Lopez-calero G, Socorro J, Roo FJ, Izquierdo MS, Fernandez AJ. Combined effect of lipid level and fish meal quality on liver histology of gilthead seabream *Sparus aurata*. *Aquaculture* 1999 179: 277–290.
4. Power DM, Melo J, Santos CRA. The effect of food deprivation on the liver, thyroid hormones and trans-retin in sea bream. *J FISH BIOL* 2000 56: 374–387.
5. Drew RE, Rodnich KJ, Settles M, Wacyk J, Churchill E, Powell MS, et al. Effect of starvation on transcriptomes of brain and liver in adult female zebrafish (*Danio rerio*). *PHYSIOL GENOMICS* 2008 35: 283–295. doi: [10.1152/physiolgenomics.90213.2008](https://doi.org/10.1152/physiolgenomics.90213.2008) PMID: [18728227](https://pubmed.ncbi.nlm.nih.gov/18728227/)
6. Mommsen TP. Salmon spawning migration and muscle protein metabolism: the August Krogh principle at work. *COMP BIOCHEM PHYS D* 2004 B139: 383–400.
7. Salem M, Silverstein J, Iii CER, Yao J. Effect of starvation on global gene expression and proteolysis in rainbow trout (*Oncorhynchus mykiss*). *BMC Genomics* 2007 8: 328–344 PMID: [17880706](https://pubmed.ncbi.nlm.nih.gov/17880706/)
8. Picha ME, Turano MJ, Beckman BR, Borski RJ. Endocrine biomarkers of growth and applications to aquaculture: a minireview of growth hormone, insulin-like growth factor (IGF)-I, and IGF-binding proteins as potential growth indicators in fish. *N. Am. J. Aquac* 2008 70:196–211.
9. Beckman BR. Perspectives on concordant and discordant relations between insulin-like growth factor 1 (IGF1) and growth in fishes. *Gen. Comp. Endocrinol* 2011 170:233–252. doi: [10.1016/j.ygcen.2010.08.009](https://doi.org/10.1016/j.ygcen.2010.08.009) PMID: [20800595](https://pubmed.ncbi.nlm.nih.gov/20800595/)
10. Rescan PY, Montfort J, Rallièrè C, Le CA, Esquerrè D, Hugot K. Dynamic gene expression in fish muscle during recovery growth induced by a fasting-refeeding schedule. *BMC Genomics* 2007 8: 438–456. PMID: [18045468](https://pubmed.ncbi.nlm.nih.gov/18045468/)
11. Martin SAM, Douglas A, Houlihan DF, Secombes CJ. Starvation alters the liver transcriptome of the innate immune response in Atlantic salmon (*Salmo salar*). *BMC Genomics* 2010 11: 418–438. doi: [10.1186/1471-2164-11-418](https://doi.org/10.1186/1471-2164-11-418) PMID: [20602791](https://pubmed.ncbi.nlm.nih.gov/20602791/)
12. Han X, Wu X, Chung WY, Li T, Nekrutenko A, Altman NS, et al. Transcriptome of embryonic and neonatal mouse cortex by highthroughput RNA sequencing. *Proc Natl Acad Sci USA* 2009 106(31):12741–12746. doi: [10.1073/pnas.0902417106](https://doi.org/10.1073/pnas.0902417106) PMID: [19617558](https://pubmed.ncbi.nlm.nih.gov/19617558/)
13. Margulies M, Egholm M, Altman WE, Attiya S, Bader JS, Bemben LA, et al. Genome sequencing in microfabricated high-density picolitre reactors. *Nature* 2005 437: 376–380. PMID: [16056220](https://pubmed.ncbi.nlm.nih.gov/16056220/)
14. Metzker ML. Sequencing technologies—the next generation. *NAT REV GENET* 2009 11: 31–46. doi: [10.1038/nrg2626](https://doi.org/10.1038/nrg2626) PMID: [19997069](https://pubmed.ncbi.nlm.nih.gov/19997069/)
15. Sun X, Zhou S, Meng F, Liu S. De novo assembly and characterization of the garlic (*Allium sativum*) bud transcriptome by Illumina sequencing. *PLANT CELL REP* 2012 31: 1823–1828. doi: [10.1007/s00299-012-1295-z](https://doi.org/10.1007/s00299-012-1295-z) PMID: [22684307](https://pubmed.ncbi.nlm.nih.gov/22684307/)

16. Wang Z, Gerstein M, Snyder M. RNA-Seq: a revolutionary tool for transcriptomics. *NAT REV GENET* 2009 10: 57–63. doi: [10.1038/nrg2484](https://doi.org/10.1038/nrg2484) PMID: [19015660](https://pubmed.ncbi.nlm.nih.gov/19015660/)
17. Wheat CW. Rapidly developing functional genomics in ecological model systems via 454 transcriptome sequencing. *Genetics* 2010 138: 433–451.
18. Salem M, Rexroad CE, Wang J, Thorgaard GH, Yao J. Characterization of the rainbow trout transcriptome using Sanger and 454-pyrosequencing approaches. *BMC Genomics* 2010 11: 564–574. doi: [10.1186/1471-2164-11-564](https://doi.org/10.1186/1471-2164-11-564) PMID: [20942956](https://pubmed.ncbi.nlm.nih.gov/20942956/)
19. Yang DH, Liu Q, Yang MJ, Wu HZ, Wang QY, Xiao JF, et al. RNA-seq liver transcriptome analysis reveals an activated MHC-1 pathway and an inhibited MHC-II pathway at the early stage of vaccine immunization in zebrafish. *BMC Genomics* 2012 13: 319–335. doi: [10.1186/1471-2164-13-319](https://doi.org/10.1186/1471-2164-13-319) PMID: [22805612](https://pubmed.ncbi.nlm.nih.gov/22805612/)
20. Magnanou E, Klopp C, Noirot C, Besseau L, Falcón J. Generation and characterization of the sea bass *Dicentrarchus labrax* brain and liver transcriptomes. *Gene* 2014 544: 56–66. doi: [10.1016/j.gene.2014.04.032](https://doi.org/10.1016/j.gene.2014.04.032) PMID: [24768179](https://pubmed.ncbi.nlm.nih.gov/24768179/)
21. Fox SE, Christie MR, Marine M, Priest HD, Mockler TC, Blouin MS. Sequencing and characterization of the anadromous steelhead (*Oncorhynchus mykiss*) transcriptome. *MAR GENOM* 2014 15: 13–15.
22. Caldach-Giner JA, Bermejo-Nogales A, Benedito-Palos L, Estensoro I, Ballester-Lozano G, Sitja-Bobadilla A, et al. Deep sequencing for *de novo* construction of a marine fish (*Sparus aurata*) transcriptome database with a large coverage of protein-coding transcripts. *BMC Genomics* 2013 14: 178–189. doi: [10.1186/1471-2164-14-178](https://doi.org/10.1186/1471-2164-14-178) PMID: [23497320](https://pubmed.ncbi.nlm.nih.gov/23497320/)
23. Mu YN, Ding F, Cui P, Ao JQ, Hu SN, Chen XH. Transcriptome and expression profiling analysis revealed changes of multiple signaling pathways involved in immunity in the large yellow croaker during *Aeromonas hydrophila* infection. *BMC Genomics* 2010 11: 506–520. doi: [10.1186/1471-2164-11-506](https://doi.org/10.1186/1471-2164-11-506) PMID: [20858287](https://pubmed.ncbi.nlm.nih.gov/20858287/)
24. Mu YN, Li MY, Ding F, Ding Y, Ao JQ, Hu SN, et al. *De Novo* characterization of the spleen transcriptome of the large yellow croaker (*Pseudosciaena crocea*) and analysis of the immune relevant genes and pathways involved in the antiviral response. *PLOS ONE* 2014 9: e97471. doi: [10.1371/journal.pone.0097471](https://doi.org/10.1371/journal.pone.0097471) PMID: [24820969](https://pubmed.ncbi.nlm.nih.gov/24820969/)
25. Xiao S, Han Z, Wang P, Han F, Liu Y, Li J, et al. Functional marker detection and analysis on a comprehensive transcriptome of large yellow croaker by next generation sequencing. *PLOS ONE* doi: [10.1371/journal.pone.0124432](https://doi.org/10.1371/journal.pone.0124432)
26. Mortazavi A, Williams BA, McCue K, Schaeffer L, Wold B. Mapping and quantifying mammalian transcriptomes by RNA-Seq. *Nature methods* 2008 5: 621–628. doi: [10.1038/nmeth.1226](https://doi.org/10.1038/nmeth.1226) PMID: [18516045](https://pubmed.ncbi.nlm.nih.gov/18516045/)
27. Jitrapakdee S. Transcription factors and coactivators controlling nutrient and hormonal regulation of hepatic gluconeogenesis. *INT J BIOCHEM CELL B* 2012 44: 33–45.
28. Metón I, Fernández F, Baanante IV. Short- and long-term effects of refeeding on key enzyme activities in glycolysis-gluconeogenesis in the liver of gilthead seabream (*Sparus aurata*). *Aquaculture* 2003 225: 99–107.
29. Johansen KA, Overturf K. Alterations in expression of genes associated with muscle metabolism and growth during nutritional restriction and refeeding in rainbow trout. *Comp. Biochem. Physiol.* 2006 144B: 119–127.
30. Watanabe T. Lipid nutrition in fish. *Comp. Biochem. Physiol.* 1982 73B: 3–15.
31. Martin SAM, Douglas A, Houlihan DF, Secombes CJ. Starvation alters the liver transcriptome of the innate immune response in Atlantic salmon (*Salmo, salar*). *BMC Genomics* 2010 11: 418–838. doi: [10.1186/1471-2164-11-418](https://doi.org/10.1186/1471-2164-11-418) PMID: [20602791](https://pubmed.ncbi.nlm.nih.gov/20602791/)
32. Havel RJ. Lipoproteins and Lipid transport. *Adv. Exp. Med. Biol.* 1975 63: 37–59. PMID: [173151](https://pubmed.ncbi.nlm.nih.gov/173151/)
33. Liu RZ, Denovan-Wright EM, Wright JM. Structure, linkage mapping and expression of the heart-type fatty acid-binding protein gene (fabp3) from zebrafish (*Danio rerio*). *Eur. J. Biochem.* 2003 270(1): 3223–3234.
34. Gabillard JC, Kamangar BB, Montserrat N. Coordinated regulation of the GH/IGF system genes during refeeding in rainbow trout (*Oncorhynchus mykiss*). *J. ENDOTOXIN RES.* 2006 191(1): 15–24.
35. Fraser KPP, Rogers AD. Protein metabolism in marine animals: The underlying mechanism of growth. *ADV. MAR. BIOL.* 2007 52: 267–362. PMID: [17298892](https://pubmed.ncbi.nlm.nih.gov/17298892/)
36. Frick NT, Bystriansky JS, Ip YK, Chew SF, Ballantyne JS. Carbohydrate and amino acid metabolism in fasting and aestivating African lungfish (*Protopterus dolloi*). *Comp Biochem Phys A* 2008 151: 85–92.
37. Thomas DS, Livak KJ. Analyzing real-time PCR data by the comparative CT method. *Nat. Protocols* 2008 3: 1101–1108.
